# Supplementary material for: Proteomic analysis shows decreased Type I fibers and ectopic fat accumulation in skeletal muscle from women with PCOS
Source: bioRxiv or medRxiv preprint supplement (doi:10.1101/2023.03.08.23286896), 2023-12-07
Supplement: Supplementary file [file media-1.pdf]

## **Total protein expression and phosphosites**

### *Tissue Lysis and LC/MS-MS*

The samples were homogenized in 300 µl lysis buffer (50 mM triethylammonium bicarbonate (TEAB; Fluka, Sigma Aldrich) and 2% sodium dodecyl sulfate (SDS)) with 1.4 mm ceramic spheres (FastPrep matrix D) using FastPrep®-24 instrument (MP Biomedicals, OH, USA). The protein concentration was determined using Pierce™ BCA Protein Assay (Thermo Scientific, Rockford, USA) and the Benchmark Plus microplate reader (Bio-Rad Laboratories, Hercules, USA). The separate reference samples for muscle and fat were prepared by mixing the equal aliquots of each of the corresponding samples.

### *Sample preparation for global proteomic analysis*

Aliquots containing 25 µg of each experimental sample or reference sample were digested with trypsin using the filter-aided sample preparation (FASP) method. Briefly, protein samples were reduced with 100 mM dithiothreitol at 60°C for 30 min, transferred on 30 kDa MWCO Nanosep centrifugal filters (Pall Life Sciences, Ann Arbor, USA), washed with 8M urea solution and alkylated with 10 mM methyl methanethiosulfonate in 50 mM TEAB and 1% sodium deoxycholate. Digestion was performed in 50 mM TEAB, 1% sodium deoxycholate at 37°C in two stages: the samples were incubated with 250 ng of Pierce MS-grade trypsin (Thermo Fisher Scientific, Rockford, USA) for 3h, then 250 ng more of trypsin was added and the digestion was performed overnight. The peptides were collected by centrifugation, labelled using TMT 10-plex isobaric mass tagging reagents (Thermo Scientific) according to the manufacturer instructions. The labelled samples were mixed, sodium deoxycholate was removed by acidification with 10% trifluoroacetic acid (TFA).

The mixed labeled samples were fractionated on the AKTA chromatography system (GE Healthcare Life Sciences, Sweden) using the XBridge C18 3.5 µm, 3.0x150 mm column (Waters Corporation, Milford, USA) and 25 min gradient from 7% to 40% solvent B at the flowrate of 0.4 ml/min; solvent A was 10 mM ammonium formate in water at pH 10.00, solvent B was 90% acetonitrile, 10% 10 mM ammonium formate in water at pH 10.00. The initial 40 fraction were combined into 20 pooled fractions in the order 1+21, 2+22, 3+23 etc. The pooled fractions were dried on Speedvac and reconstituted in 20 µl of 3% acetonitrile, 0.1% formic acid for analysis.

### *Sample Preparation for phosphoproteomic analysis*

Aliquots containing 450 µg of each experimental sample or reference sample were digested with trypsin using the filter-aided sample preparation (FASP) method. The phosphopeptides were enriched using Pierce TiO<sub>2</sub> Phosphopeptide Enrichment and Clean Up Kit (Thermo Fisher Scientific) according to the manufacturer protocol. The purified phosphopeptide samples were evaporated to dryness, reconstituted in 50 mM TEAB and labelled using TMT 10-plex isobaric mass tagging reagents (Thermo Fisher Scientific) according to the manufacturer instructions. The TMT-labelled phosphopeptide samples were mixed into corresponding sets and purified using Pierce C-18 Spin Columns (Thermo Fisher Scientific) according to the manufacturer instructions. Purified samples were dried on Speedvac and reconstituted in 15 µl of 3% acetonitrile, 0.1% formic acid for analysis.

### *LC-MS/MS Analysis*

Each fraction for global proteomic study was analysed on Orbitrap Fusion Tribrid (Thermo Fisher Scientific) interfaced with Thermo Easy-nLC 1000 nanoflow liquid chromatography system (Thermo Fisher Scientific). Peptides were trapped on the C18 trap column (100 µm X 3 cm, particle size 3 µm) separated on the C18 analytical column (75 µm X 30 cm) home-packed with 3 µm Reprosil-Pur C18-AQ particles (Dr. Maisch, Germany) using the gradient from 5% to 25% B in 45 min, from 25% to 80% B in 5 min, solvent A was 0.2% formic acid and solvent B was 98% acetonitrile, 0.2% formic acid. Precursor ion mass spectra were recorded at 120 000 resolution. The most intense precursor ions were selected ('top speed' setting with a duty cycle of 3s), fragmented using CID at collision energy setting of 30 spectra and the MS<sub>2</sub> spectra were recorded in ion trap. Dynamic exclusion was set to 30 s with 10 ppm tolerance. MS<sub>3</sub> spectra were recorded at 60 000 resolution with HCD fragmentation at collision energy of 55 using the synchronous precursor selection of the 5 most abundant MS/MS fragments.

The phosphopeptide samples were analysed on Orbitrap Fusion Tribrid mass spectrometer interfaced with Thermo Easy-nLC 1200 nanoflow liquid chromatography system. Peptides were trapped on the NanoViper C18 trap column (100 µm X 2 cm, particle size 2 µm, Thermo Scientific) and separated on the home-packed C18 analytical column (75 µm X 30 cm) using the gradient from 7% to 32% B in 100 min, from 32% to 100% B in 5 min, solvent A was 0.2% formic acid and solvent B was 80%

acetonitrile, 0.2% formic acid. The mass spectrometry settings were the same as described above for the global proteomic analysis, but HCD fragmentation at collision energy 33 was used in MS2.

### **mRNA expression array**

mRNA was extracted from adipose tissue (n=17) and skeletal muscle (n=8) biopsies collected at steady-state during the hyperinsulinemic euglycemic clamp before and after 5 weeks of electrical stimulation in those with PCOS using the RNeasy Lipid Tissue Mini Kit for adipose tissue and RNeasy Fibrous Tissue Mini Kit for skeletal muscle (Qiagen). Nucleic acid concentration was measured with a spectrophotometer (NanoDrop, Thermo Scientific), and RNA quality was determined with an automated electrophoresis station (Experion, Bio-Rad). A HumanHT-12 v4 Expression BeadChip array (Illumina) was used to analyze global mRNA expression. cRNA synthesis, including biotin labeling, was carried out using an Illumina TotalPrep RNA Amplification Kit (Life Technologies & Invitrogen). Biotin-cRNA complex was then fragmented and hybridized to the probes on the Illumina BeadChip array before hybridized and stained with streptavidin-Cy3 according to the manufacturer's instructions. Probes were visualization with an Illumina HiScan fluorescence camera. The Oligo package from Bioconductor was used to compute robust multichip average expression measures (Bolstad *et al.*, 2003).

### **DNA methylation array**

For methylation array studies, DNA was isolated from adipose tissue (n=17) and skeletal muscle (n=9) biopsies taken at steady-state during the hyperinsulinemic euglycemic clamp before and after 5 weeks of electrical stimulation of women with PCOS using the QIAamp DNA Mini Kit (Qiagen). Nucleic acid concentrations and purity were estimated with a NanoDrop spectrophotometer (Thermo Scientific, Wilmington, DE), and DNA integrity was checked by gel electrophoresis. Genome-wide DNA methylation was analyzed with the Infinium HumanMethylation450k BeadChip array (Illumina). The array contains 485,577 cytosine probes covering 21,231 (99%) RefSeq genes (Bibikova *et al.*, 2011). A DNA Methylation Kit (D5001-D5002, Zymo Research) was used to convert genomic DNA to bisulfite-modified DNA. Briefly, gDNA (500 ng) of high quality was fragmented and hybridized on the

BeadChip, and the intensities of the signals were measured with a HiScanQ scanner (Illumina).

### *Array data analysis*

The bioinformatics analyses of DNA methylation array data were performed as described previously (Ronn *et al.*, 2015). In brief, Y chromosome probes, rs-probes, and probes with an average detection  $p$ -value  $> 0.01$  were removed. After quality control and filtering, methylation data were obtained for 298,289 CpG sites in adipose tissue and 298,332 CpG sites in skeletal muscle. Beta-values were converted to M-values ( $M = \log_2(\beta/(1 - \beta))$ ), which were used for all data analyses. Data were then quantile normalized and batch corrected with COMBAT (Johnson *et al.*, 2007). The differentially methylated sites were identified using a paired t-test (limma package, Bioconductor). To improve interpretation, after all the preprocessing steps the data were reconverted to beta-values ranging from 0% (unmethylated) to 100% (completely methylated).

### References

- Bibikova M, Barnes B, Tsan C, Ho V, Klotzle B, Le JM, Delano D, Zhang L, Schroth GP, Gunderson KL, Fan JB & Shen R. (2011). High density DNA methylation array with single CpG site resolution. *Genomics* **98**, 288-295.
- Bolstad BM, Irizarry RA, Astrand M & Speed TP. (2003). A comparison of normalization methods for high density oligonucleotide array data based on variance and bias. *Bioinformatics* **19**, 185-193.
- Johnson WE, Li C & Rabinovic A. (2007). Adjusting batch effects in microarray expression data using empirical Bayes methods. *Biostatistics* **8**, 118-127.
- Ronn T, Volkov P, Gillberg L, Kokosar M, Perfilyev A, Jacobsen AL, Jorgensen SW, Brons C, Jansson PA, Eriksson KF, Pedersen O, Hansen T, Groop L, Stener-Victorin E, Vaag A, Nilsson E & Ling C. (2015). Impact of age, BMI and HbA1c levels on the genome-wide DNA methylation and mRNA expression patterns in human adipose tissue and identification of epigenetic biomarkers in blood. *Human molecular genetics* **24**, 3792-3813.
